# Supplementary material for: VEGF-B, VEGF-A, FLT-1, KDR, ERBB2, EGFR, GRB2, RAC1, CDH1 and HYAL-1 Genes Expression Analysis in Canine Mammary Gland Tumors and the Association with Tumor ClinicoPathological Parameters and Dog Breed Assessment
Source: MDPI journal article supplement (doi:10.3390/vetsci8100212), 2021-09-30
Supplement: s1 [file s1]

**Supplementary Table S1.** Description of participants and mammary gland carcinomas.

| Row no. | Breed                       | Age (years) | Carcinoma type                  | Malignancy grade | Stage |
|---------|-----------------------------|-------------|---------------------------------|------------------|-------|
| 1.      | American Toy Terrier        | 11          | Carcinoma-solid                 | I                | III   |
| 2.      | Boxer                       | 10          | Carcinoma-mixed type            | I                | III   |
| 3.      | Dachshund                   | 15          | Carcinoma-solid                 | II               | III   |
| 4.      | Bichon Frise                | 5           | Carcinoma-complex type          | I                | I     |
| 5.      | German Shepherd             | 10          | Carcinoma-complex type          | III              | III   |
| 6.      | German Shepherd             | 7           | Carcinoma-complex type          | III              | III   |
| 7.      | German Shepherd             | 9           | Carcinoma-complex type          | II               | III   |
| 8.      | German Shepherd             | 9           | Inflammatory carcinoma          | I                | III   |
| 9.      | German Shepherd             | 10          | Carcinoma-complex type          | II               | IV    |
| 10.     | German Shepherd             | 10          | Intraductal papillary carcinoma | I                | III   |
| 11.     | German Shepherd             | 10          | Carcinoma-solid                 | I                | IV    |
| 12.     | German Shepherd             | 8           | Carcinoma-simple                | I                | III   |
| 13.     | German Shepherd             | 10          | Carcinoma-simple                | I                | III   |
| 14.     | German Shepherd             | 7           | Carcinoma-mixed type            | III              | IV    |
| 15.     | German Shepherd             | 10          | Carcinoma-mixed type            | I                | II    |
| 16.     | Yorkshire Terrier           | 7           | Inflammatory carcinoma          | I                | I     |
| 17.     | Yorkshire Terrier           | 9           | Carcinoma-mixed type            | II               | IV    |
| 18.     | Yorkshire Terrier           | 7           | Carcinoma-solid                 | I                | I     |
| 19.     | Yorkshire Terrier           | 9           | Carcinoma-simple                | I                | V     |
| 20.     | Yorkshire Terrier           | 11          | Intraductal papillary carcinoma | I                | I     |
| 21.     | Maltese                     | 10          | Carcinoma-mixed type            | I                | II    |
| 22.     | Miniature Pinscher          | 8           | Carcinoma-complex type          | I                | I     |
| 23.     | Miniature Pinscher          | 14          | Carcinoma-mixed type            | III              | IV    |
| 24.     | Mixed breed                 | 11          | Malignant myoepithelioma        | II               | III   |
| 25.     | Mixed breed                 | 14          | Malignant myoepithelioma        | I                | III   |
| 26.     | Mixed breed                 | 14          | Carcinoma-complex type          | I                | III   |
| 27.     | Mixed breed                 | 13          | Inflammatory carcinoma          | I                | III   |
| 28.     | Mixed breed                 | 3           | Carcinoma-solid                 | I                | III   |
| 29.     | Mixed breed                 | 12          | Carcinoma-solid                 | I                | III   |
| 30.     | Mixed breed                 | 12          | Carcinoma-solid                 | I                | IV    |
| 31.     | Mixed breed                 | 14          | Carcinoma-mixed type            | I                | I     |
| 32.     | Mixed breed                 | 10          | Carcinoma-simple                | I                | II    |
| 33.     | Mixed breed                 | 15          | Carcinoma-simple                | III              | III   |
| 34.     | Mixed breed                 | 12          | Carcinoma-solid                 | III              | III   |
| 35.     | Mixed breed                 | 14          | Carcinoma-solid                 | III              | III   |
| 36.     | Mixed breed                 | 14          | Carcinoma-complex type          | III              | III   |
| 37.     | Mixed breed                 | 15          | Carcinoma-solid                 | III              | IV    |
| 38.     | Mixed breed                 | 10          | Intraductal papillary carcinoma | II               | III   |
| 39.     | Mixed breed                 | 14          | Carcinoma-simple                | I                | IV    |
| 40.     | Mixed breed                 | 11          | Carcinoma-mixed type            | I                | V     |
| 41.     | Mixed breed                 | 10          | Squamous cell carcinoma         | III              | III   |
| 42.     | Newfoundland                | 13          | Carcinoma-solid                 | III              | III   |
| 43.     | Poodle                      | 12          | Carcinoma-mixed type            | I                | II    |
| 44.     | Scottish Terrier            | 9           | Carcinoma-complex type          | I                | I     |
| 45.     | Siberian Husky              | 12          | Carcinoma-solid                 | III              | III   |
| 46.     | Siberian Husky              | 10          | Carcinoma-complex type          | II               | II    |
| 47.     | Vizsla                      | 7           | Comedocarcinoma                 | I                | IV    |
| 48.     | West Highland White Terrier | 10          | Carcinoma-complex type          | III              | I     |

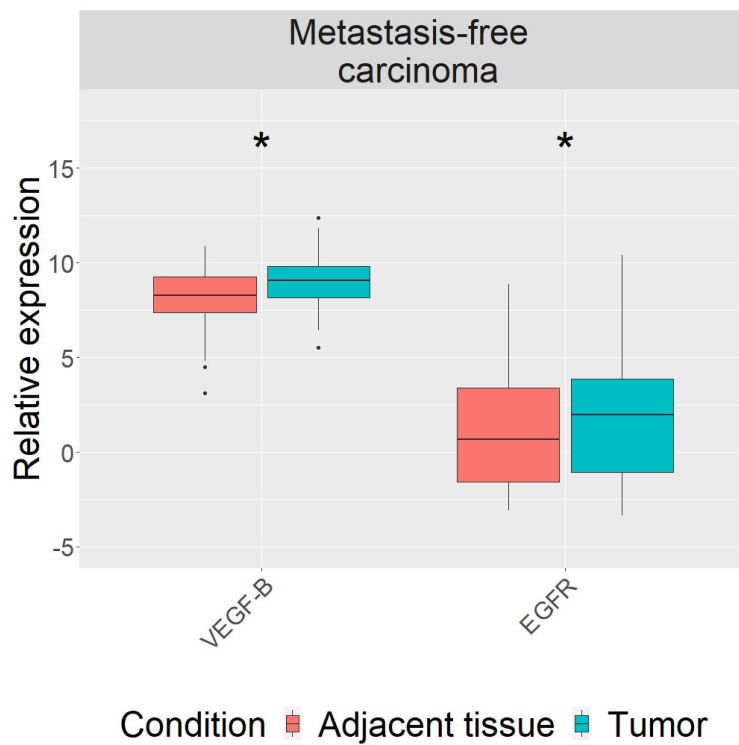

**Supplementary Figure S1.** *VEGF-B* (A) and *EGFR* (B) expression comparison between in metastasis-free carcinoma and adjacent tissue of all dogs. Dots indicate outliers. \*—  $p < 0.05$  measured with Wilcoxon or t-tests.

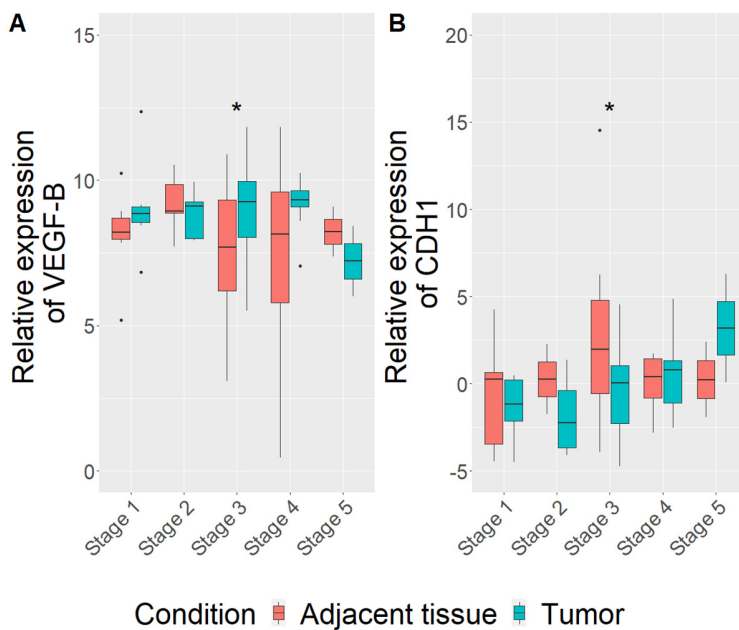

**Supplementary Figure S2.** *VEGF-B* (A) and *CDH1* (B) expression comparison between different stages CMTs of all dogs in tumor and adjacent tissue. Dots indicate outliers. \*—  $p < 0.05$  measured with Wilcoxon or t-tests.

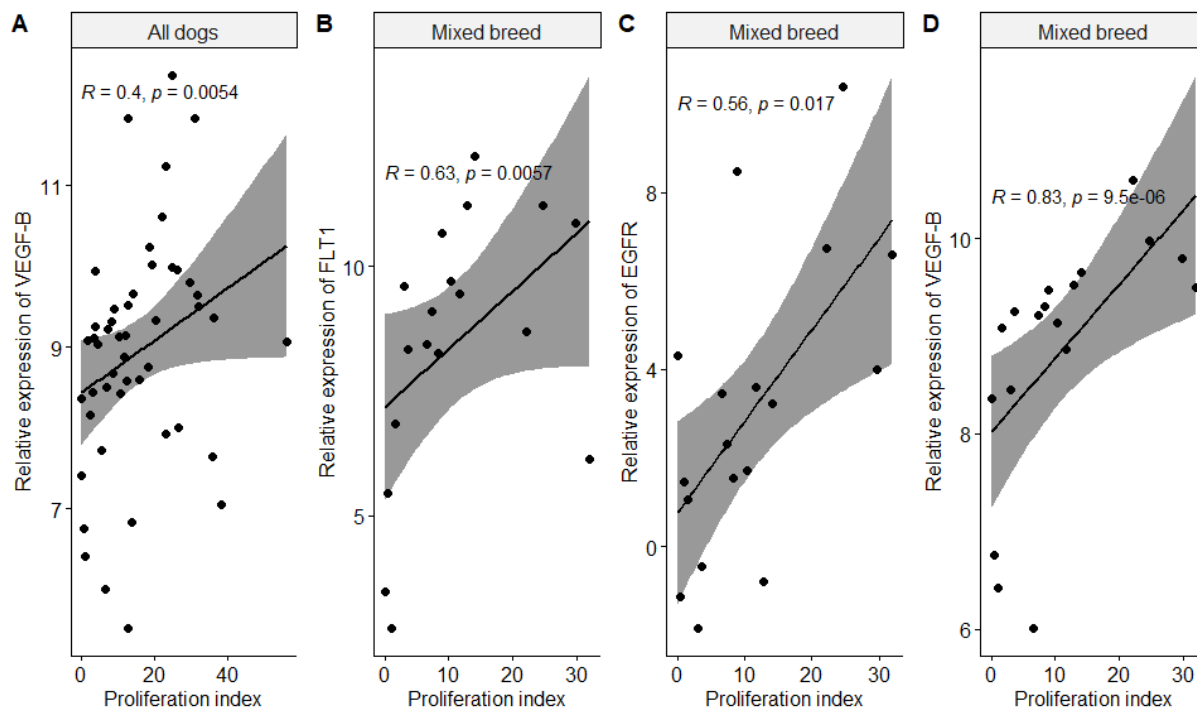

**Supplementary Figure S3.** Correlation analysis between genes expression level and proliferation indices values. Analysis performed: in all breed dogs group of *VEGF-B* gene (**A**), in mixed-breed dogs groups of *FLT1* (**B**), *EGFR* (**C**), and *VEGF-B* (**D**) genes.

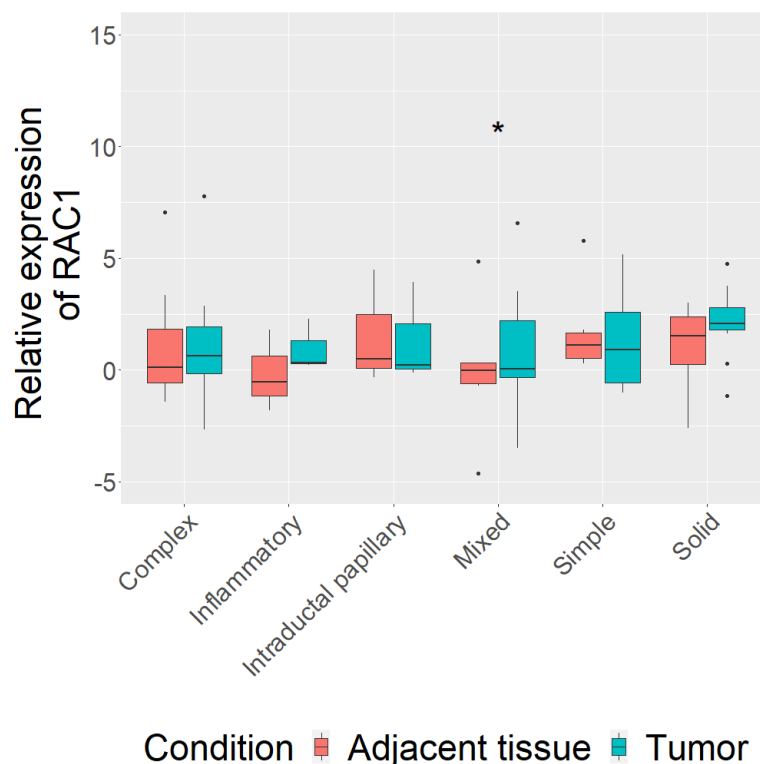

**Supplementary Figure S4.** Comparison of *RAC1* gene expression level in tumor tissues between dogs with different types of carcinomas. Dots indicate outliers. \*—  $p < 0.05$  measured with Wilcoxon or T tests.

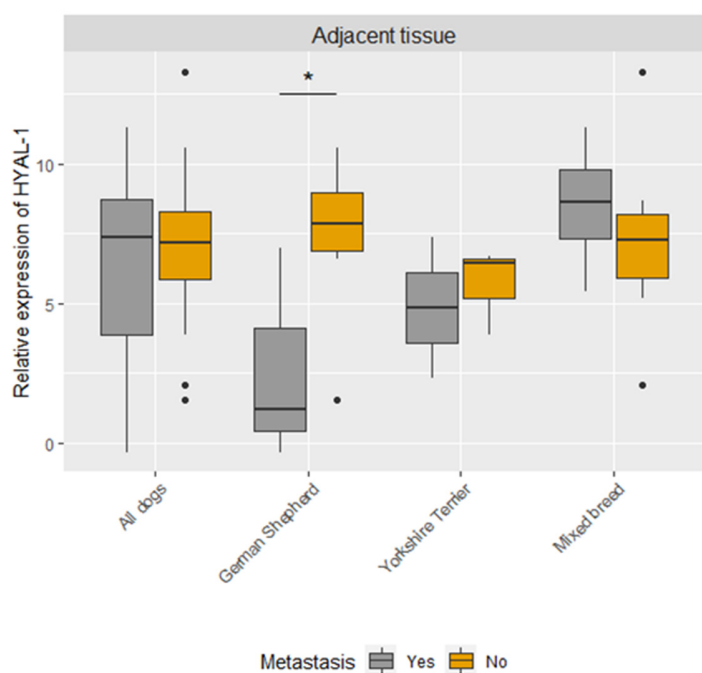

**Supplementary Figure S5.** Comparison of *HYAL-1* gene expression level in tumor adjacent tissues between dogs with and without metastasis. Dots indicate outliers. \*—  $p < 0.05$  measured with Wilcoxon or T tests.

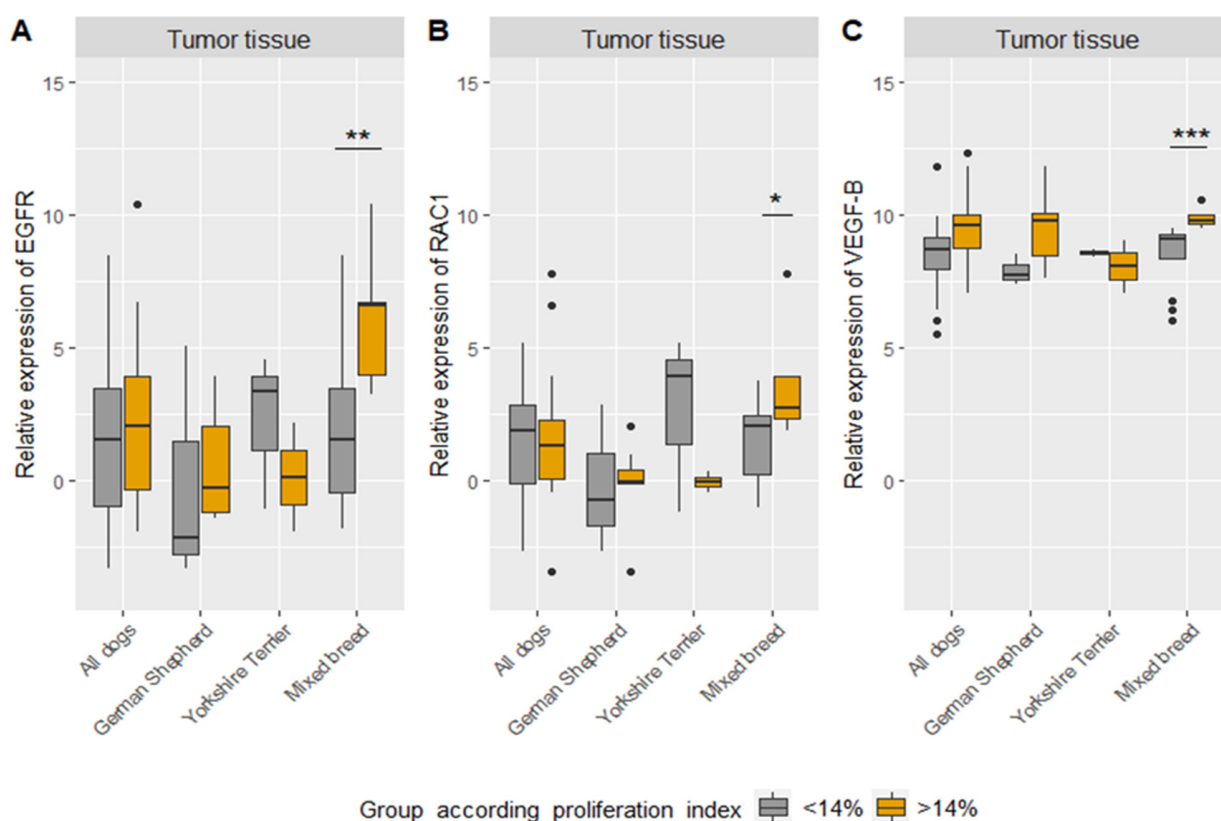

**Supplementary Figure S6.** Comparison of *EGFR* (A), *RAC1* (B), and *VEGF-B* (C) genes expression level in tumor tissues between dogs with low (<14%) and high (>14%) proliferation index. Dots indicate outliers. \*—  $p < 0.05$ , \*\*—  $p < 0.01$ , \*\*\*—  $p < 0.001$  measured with Wilcoxon or t-tests.
